# Supplementary material
Source: HighWire-hosted journal article supplement (https://bmjopen.bmj.com/content/7/9/e014417)
Supplement: inline-supplementary-material-1 [file inline-supplementary-material-1.pdf]

## Appendix A

| Authors                 | Year | Model/Concept                                                                           | Purpose                                                                                                                                              | Type                 | Sustainability Constructs Identified                                                                                                                                                                                                                                                                                                                                                                                                                | Scoring                                      |
|-------------------------|------|-----------------------------------------------------------------------------------------|------------------------------------------------------------------------------------------------------------------------------------------------------|----------------------|-----------------------------------------------------------------------------------------------------------------------------------------------------------------------------------------------------------------------------------------------------------------------------------------------------------------------------------------------------------------------------------------------------------------------------------------------------|----------------------------------------------|
| Goodman                 | 1993 | Level of institutionalization (LOIN) scales                                             | Research instrument and diagnostic tool                                                                                                              | Scale                | 8 factor model- 15 three part items. Production routine, Production niche saturation, Maintenance routine, Maintenance niche saturation, supportive routine, Supportive niche saturation, Managerial routine, Managerial niche saturation                                                                                                                                                                                                           | Likert scale                                 |
| Kotter                  | 1995 | Anchoring Change                                                                        | Raise awareness of the common errors made during change initiatives                                                                                  | Model                | Establishing a sense of urgency, Formation of a powerful guiding coalition, Creating a vision, Communicating the vision, Empowering others to act on the vision, Planning for and creating short term wins, Consolidating improvements and producing more change, Institutionalising new approaches.                                                                                                                                                | none                                         |
| Dale et al.             | 1997 | The TQM sustainability audit tool (TQMSAT)                                              | Looks for a specific set of predetermined negative factors; that have been identified as detrimental to sustaining TQM                               | Tool                 | Internal/external environment, Management Style, Policies, Organisation structure, Process of change. 23 sub themes including: communication, human resource, improvement infrastructure, education and training                                                                                                                                                                                                                                    | Rate each of the issues on a scale of 1 to 6 |
| Shediac-Rizkallah& Bone | 1998 | Conceptual framework for planning for sustainability of community based health programs | An organizing framework for conceptualizing and measuring sustainability and tentative guidelines to facilitate sustainability in community programs | Conceptual Framework | (1) Project design and implementation factors, Project negotiation process. Project effectiveness. Project duration. Project financing<br>Project type, Training<br>(2) Factors within the organizational setting: Institutional strength<br>Integration with existing programs/services<br>Program champion/leadership<br>(3) Factors in the broader community environment: Socioeconomic and political considerations<br>Community participation. | none                                         |
| Glasgow et al.          | 1999 | RE-AIM                                                                                  | Provides a framework for determining what programs are worth sustained investment and for identifying those that work in real-world environments     | Framework            | Reach- patient and staff participation, Efficacy- positive and negative effects of interventions, Adoption-proportion and representation of settings, Implementation-extent to which intervention is delivered as intended and Maintenance-institutionalisation, routine, culture and norms.                                                                                                                                                        | 0 to 1 (or 0% to 100%) scale.                |

## Appendix A

|                     |      |                                                                      |                                                                                                                                        |                         |                                                                                                                                                                                                                                                                                            |                                                                                    |
|---------------------|------|----------------------------------------------------------------------|----------------------------------------------------------------------------------------------------------------------------------------|-------------------------|--------------------------------------------------------------------------------------------------------------------------------------------------------------------------------------------------------------------------------------------------------------------------------------------|------------------------------------------------------------------------------------|
| Johnson et al       | 2004 | A sustainability Planning Model                                      | Addresses factors known to inhibit efforts to sustain an innovation                                                                    | Model                   | Sustainability Capacity, Administrative structures and linkages, Champion roles and leadership actions, resources, policies and procedures, Expertise, Sustainable innovation attributes, Alignment, positive relationships, implementation quality and effectiveness, sustainable actions | none                                                                               |
| Sirkin              | 2005 | DICE tool                                                            | To rate and track transformation initiative progress                                                                                   | Tool                    | Duration, Integrity of performance, Senior management commitment, Local-level commitment, effort                                                                                                                                                                                           | Likert scale (1-4) Low scores being better.                                        |
| Edwards             | 2007 | Catholic Healthcare partners HF-GAP Sustainability Assessment (AHRQ) | To trigger planning for sustainability early in a project's design                                                                     | Framework and checklist | Five components for developing sustainability: identity goals, infrastructure, incentives, incremental opportunities for participation, and integration                                                                                                                                    | Rate your organisation: - 1: Problem, 0: Neither positive or negative, 1: Strength |
| Gruen               | 2008 | Health-programme sustainability                                      | To provide comprehensive sustainability planning                                                                                       | Model                   | Context and resource availability, encompassing health concerns, interventions, and drivers, emphasising dynamic interactions between components                                                                                                                                           | none                                                                               |
| Feldstein & Glasgow | 2008 | A practical robust implementation and sustainability model (PRISM)   | To enhance implementation and sustainability                                                                                           | Model                   | Program, external environment, Implementation and Sustainability Infrastructure, Recipients with 39 sub-elements to assess                                                                                                                                                                 | none                                                                               |
| Bowman              | 2008 | QUERI Implementation Model                                           | Proposes a number of recommendations regarding the design of a sustainability analysis                                                 | Framework and model     | 1) intervention fit, 2) intervention fidelity, 3) intervention dose, and 4) level of the intervention target                                                                                                                                                                               | none                                                                               |
| Johnson et al       | 2009 | A sustainability toolkit for prevention using getting to outcomes    | To provide a process to organize, implement, and evaluate an effective plan for sustaining prevention infrastructure and interventions | Toolkit                 | Capacity, Infrastructure, Intervention, Routinization, Benefits to diverse populations                                                                                                                                                                                                     | none                                                                               |

## Appendix A

|             |      |                                                        |                                                                                                                                                               |           |                                                                                                                                                                                                                                                                                                                                                                                          |                                                                       |
|-------------|------|--------------------------------------------------------|---------------------------------------------------------------------------------------------------------------------------------------------------------------|-----------|------------------------------------------------------------------------------------------------------------------------------------------------------------------------------------------------------------------------------------------------------------------------------------------------------------------------------------------------------------------------------------------|-----------------------------------------------------------------------|
| Damschroder | 2009 | Consolidated Framework For Implementation Research     | To guide formative evaluations and build the implementation knowledge base across multiple studies and settings                                               | Framework | 8 constructs related to the intervention (e.g., evidence strength and quality), 4 constructs to outer setting (e.g., patient needs and resources), 12 constructs to inner setting (e.g., culture, leadership engagement), 5 constructs related to individual characteristics, and 8 constructs related to process (e.g., plan, evaluate, and reflect)                                    | none                                                                  |
| Maier       | 2010 | NHS sustainability Model                               | To predict the likelihood of sustainability and guide teams to things they could do to increase the chances that the change for improvement will be sustained | Model     | 10 factors: Staff involvement and training, Staff attitudes towards sustaining the change, Senior leadership engagement, Clinical leadership, Fit with the organisation's strategic aims and culture, Infrastructure for sustainability, Benefits beyond helping patient, Credibility of the benefits, Adaptability of improved process, Effectiveness of the system to monitor progress | Weighted scoring system- Max 30 points                                |
| Douglas     | 2012 | The Program Sustainability Assessment Tool             | To assess and plan for sustainability risks and develop an action plans                                                                                       | Tool      | Political support, funding stability, partnerships organisational capacity, program evaluation, program adaptation, communications, strategic planning                                                                                                                                                                                                                                   | 7 point Likert scale (To little or no extent- To a very great extent) |
| Kaplan      | 2012 | The Model for Understanding Success in Quality (MUSIQ) | To examine the role of context in QI and how context influences QI success                                                                                    | Model     | Factors effecting context: External Environment, Organisation, QI support and Capacity, Microsystem, QI Team, Miscellaneous                                                                                                                                                                                                                                                              | none                                                                  |
